# Enhancer-Mediated High Level Expression of Mouse Pituitary Glycoprotein Hormone $\alpha$ -Subunit Transgene in Thyrotropes, Gonadotropes, and Developing Pituitary Gland

Susan K. Kendall, David F. Gordon, Teresa S. Birkmeier, Dwayne Petrey, Virginia D. Sarapura, K. Sue O'Shea, William M. Wood, Ricardo V. Lloyd\*, E. Chester Ridgway, and Sally A. Camper

Department of Human Genetics (S.K.K., T.S.B., D.P., S.A.C.)  
Cell and Molecular Biology Program (S.K.K., S.A.C.)  
Department of Anatomy and Cell Biology (S.O.) and  
Department of Pathology (R.V.L.)  
University of Michigan Medical School  
Ann Arbor, Michigan 48109-0618

Division of Endocrinology (D.F.G., V.D.S., W.M.W., E.C.R.)  
Department of Medicine  
University of Colorado Health Sciences Center  
Denver, Colorado 80262

The pituitary hormones LH, FSH, and TSH are heterodimers composed of a common  $\alpha$ -subunit and unique  $\beta$ -subunits. We demonstrate that 4.6, 2.7, 1.49, or 0.48 kilobases (kb) mouse  $\alpha$ -subunit 5'-flanking sequences are sufficient for transgene expression in both gonadotropes and thyrotropes but not in inappropriate pituitary cells. In contrast, transgenes with bovine or human  $\alpha$ -subunit flanking sequences have been shown to confer reporter gene expression only to gonadotrope cells, suggesting that the elements regulating cell-specific expression may differ between species. Equal levels of reporter gene expression were conferred by 5.0 and 0.48 kb in transiently transfected thyrotrope tumor-derived cells. In contrast, in transgenic mice, high level expression was only obtained with 4.6 kb 5'-flanking sequences, indicating the presence of an enhancer element between 4.6 and 2.7 kb. The 4.6 kb of 5'-flanking sequences are sufficient for both hormonal and developmental regulation of transgene expression. Mice rendered hypothyroid by radiothyroidectomy had significantly higher levels of transgene expression than either hyperthyroid or euthyroid animals. The temporal and spatial pattern of transgene expression in Rathke's pouch paralleled that of the endogenous gene; the onset of transgene expres-

sion occurred by embryonic day 9.5. Low level expression of both the transgene and the endogenous  $\alpha$ -subunit gene were detected in some unexpected peripheral sites, such as the embryonic extraocular and olfactory regions, suggesting that  $\alpha$ -subunit may have a more diverse role in development than previously considered. (*Molecular Endocrinology* 8: 1420-1433, 1994)

## INTRODUCTION

During ontogeny, unique pituitary cell types differentiate in a sequential pattern and begin to synthesize and secrete specific hormones. Many of these circulating hormones play critical roles in the development of other organs. Three of these hormones are heterodimers composed of a common  $\alpha$ -subunit and unique  $\beta$ -subunits: TSH, LH, and FSH.

TSH stimulates thyroid hormone production in the thyroid gland and plays an important role in thyroid folliculogenesis in the fetus. Several mouse mutants demonstrate the importance of TSH for thyroid development. Snell dwarf mice lack TSH and have small, disorganized thyroid glands in which folliculogenesis appears to have been initiated but has arrested early (1). The thyroid phenotype can be reversed by TSH replacement therapy (2). Poor thyroid follicle develop-

ment is also evident in *hyt* homozygotes (3), which carry a point mutation in the TSH receptor, producing unresponsiveness to TSH stimulation (4).

LH and FSH are critical for sexual maturation during puberty and during gonadal development. LH stimulation of testicular LH receptors in the fetal testis causes an increase in testosterone production. Fetal testosterone is important for male sexual differentiation (5). The stage at which the ovaries first respond to LH and FSH varies among species (6), but gonadotropins are necessary for development of ovarian follicles in the newborn rat (5).

In the anterior pituitary gland, transcription of the common  $\alpha$ - and unique  $\beta$ -subunit genes occurs in thyrotropes that secrete TSH and gonadotropes that secrete LH and FSH. The appearance of the  $\alpha$ -subunit precedes the  $\beta$ -subunits in both rat and human embryogenesis (7–9). The DNA sequences important for the onset of  $\alpha$ - and  $\beta$ -subunit transcription have not been defined. However, sequences important for cell-specific expression of the  $\alpha$ -subunit gene have been defined by gene transfer studies. Transient transfection experiments using cultured thyrotropic or gonadotropic-derived cells or thyrotropic tumor cells have demonstrated that separate DNA sequences within the proximal 0.5 kilobase (kb) of the human and mouse promoters are important for expression of  $\alpha$ -subunit in gonadotropes and thyrotropes (10–13).

Transgenic mouse studies support the view that the cell specificity of  $\alpha$ -subunit expression is regulated by separate elements and suggest the possibility that there may be different DNA sequence requirements for expression in cell culture and animals. Expression in gonadotropes but not thyrotropes was observed with both human and bovine  $\alpha$ -subunit transgenes, suggesting that thyrotrope expression requires separate DNA sequences (14–16). Although cell culture studies defined separate thyrotropic and gonadotropic elements within 0.5 kb of the human  $\alpha$ -subunit promoter, neither 1.6 (14) nor 1.8 kb (16) of the human 5'-flanking sequences conferred thyrotrope expression. Thus, additional DNA sequences must be required for expression of the human gene in the context of the intact animal.

Species-specific differences in expression of the  $\alpha$ -subunit gene have also been noted.  $\alpha$ -Subunit is expressed in the placentas of primates and horses but not in other animals (17, 18). Functional differences in promoter activity in transfection assays suggest that differences in nucleotide sequence rather than in transacting factors may account for the placental expression. For example, although placental-specific elements are located within the proximal 184 base pairs (bp) of both the human and equine  $\alpha$ -subunit 5'-flanking regions, a similar fragment of the mouse gene is inactive in JEG3 human placental cells (19–22). Sequence differences between the human and bovine  $\alpha$ -subunit promoters also account for differences in expression and cAMP regulation in placental cells (23). Expression in the pituitary also appears to be regulated by species-

specific DNA sequences. In mouse  $\alpha$ TSH cells, the profound reduction in basal activity observed when the mouse promoter was truncated from –507 to –424 bp was not evident when similar constructs of the human gene promoter were tested (11).

We used transgenic mice to identify the DNA sequence elements that regulate expression of the mouse  $\alpha$ -subunit in adult and developing mice. We initiated these studies with the mouse  $\alpha$ -subunit gene because species-specific differences in expression of the gene suggested that the homologous mouse genomic sequences would be more likely to be appropriately expressed. We present evidence that 4.6 kb of mouse  $\alpha$ -subunit 5'-flanking region is not only sufficient for cell-specific and hormonally regulated expression in adult mice, but also contains the temporal cues for initiating expression during development. We identified an enhancer-like element between –4.6 and –2.7 kb that is essential for high level expression in transgenic mice but inactive in cell culture. However, as predicted from cell culture studies, 0.48 kb of promoter proximal sequences are sufficient for low-level cell-specific expression. Finally, we have identified novel sites of  $\alpha$ -subunit expression in the developing embryo, suggesting the possibility of additional functional roles of this gene in ontogeny.

## RESULTS

### 4.6 kb of Mouse $\alpha$ -Subunit 5'-Sequences Are Sufficient for High Level Expression in the Anterior Pituitary Gland of Transgenic Mice

A 4.6-kb fragment containing the mouse  $\alpha$ -subunit promoter was joined within the 5'-untranslated region of exon 1 to a *lacZ* reporter gene containing a nuclear localization signal (Fig. 1). Eight transgenic mouse lines were generated with this construct, 4.6  $m\alpha$ - $\beta$ gal, and screened for transgene expression by inspection of X-gal staining in pituitary frozen sections. Transgene expression was detected in seven of the eight lines. No background  $\beta$ -galactosidase staining was detected in frozen sections of any of the nontransgenic pituitaries. The level of transgene expression was quantitated in the six highest expressing lines by a fluorometric assay for  $\beta$ -galactosidase enzyme activity in extracts made from individual pituitary glands. The level of activity ranged from 200-fold over C57BL/6J background levels in transgenic line 8365 to 5-fold over background in line 8316 (Table 1). Notably, these levels of  $\beta$ -galactosidase expression were high enough to be readily detected in a 30-min assay rather than overnight assays (25). There was no correlation between the level of  $\beta$ -galactosidase activity and the copy number of the transgene, suggesting some influence of integration sites on expression.

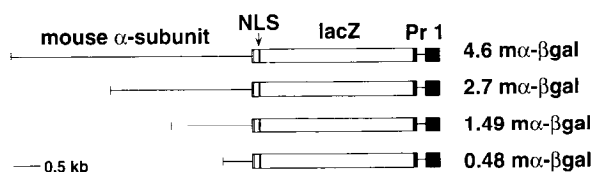

**Fig. 1. Transgene Constructs**

Four transgenes, 4.6  $m\alpha$ - $\beta$ gal, 2.7  $m\alpha$ - $\beta$ gal, 1.49  $m\alpha$ - $\beta$ gal, and 0.48  $m\alpha$ - $\beta$ gal, were isolated from either the 5.0  $m\alpha$ - $\beta$ gal or 0.48  $m\alpha$ - $\beta$ gal plasmid construct as described in *Materials and Methods*. The mouse  $\alpha$ -subunit sequences ( $m\alpha$ ) span from -4.6, -2.7, -1.49, or -0.48 kb upstream of the transcription start site to +43 bp of 5'-untranslated sequences in exon 1. In all cases, the mouse  $\alpha$ -subunit promoter is joined to a modified form of the *E. coli*  $\beta$ -galactosidase (*lacZ*) gene. The modified *lacZ* gene (*open box*) includes a translation initiation site and the SV40 T-antigen nuclear localization signal (NLS). An intron, 3'-untranslated region, and polyadenylation signal are provided by the mouse protamine-1 gene (*Pr-1, shaded*) (59).

**Table 1. The 4.6  $m\alpha$ - $\beta$ gal Transgene Confers High Level Expression in Adult Pituitary Glands**

| Transgenic Line | $\beta$ -gal Activity in Pituitary Extracts* (nmol 4MU/pituitary) | Transgene Copy Number <sup>b</sup> |
|-----------------|-------------------------------------------------------------------|------------------------------------|
| 8365            | 73                                                                | 10–50                              |
| 8690            | 53                                                                | 10–50                              |
| 8612            | 40                                                                | 50                                 |
| 8364            | 31                                                                | 50                                 |
| 8588            | 10                                                                | 10                                 |
| 8316            | 2                                                                 | 1–5                                |
| 8346            | nd <sup>c</sup>                                                   | 10–50                              |
| 8691            | nd <sup>c</sup>                                                   | 10–50                              |
| C57BL/6         | 0.4                                                               | 0                                  |

\* The amount (nanomoles) of the fluorescent product 4-methylumbelliferone (4MU) generated by cleavage of the substrate 4-methylumbelliferyl- $\beta$ -D-galactoside was quantitated in homogenates prepared from individual pituitary glands and averaged. Three to eight individuals were assayed from the five highest expressing lines.

<sup>b</sup> The copy number was estimated by comparison with standards on Southern blots (see *Materials and Methods*).

<sup>c</sup> Not determined. X-gal-stained frozen sections revealed very few lightly stained cells in line 8346 and no expression in line 8691.

### Transgene Expression Is Specific for Anterior Pituitary Thyrotropes and Gonadotropes

Transgene expression was confined to the anterior lobe of the pituitary gland in all six expressing lines (Fig. 2A). No expression was detected in the intermediate or posterior pituitary lobes. In line 8365, cell counts revealed that approximately 10–12% of the anterior pituitary cells expressed the transgene. The cell specificity of transgene expression was examined in lines 8364, 8365, and 8588 using a costaining technique that takes advantage of the nuclear localization of the  $\beta$ -galactosidase reporter gene and the localization of

stored hormones in the cytoplasm. Whole pituitaries were incubated with X-gal, embedded, sectioned, and immunostained for the anterior pituitary hormones. Cells expressing the transgene and either LH or TSH were identified by blue-staining nuclei and immunostained cytoplasm. In line 8365, the transgene was expressed in 90% of LH-positive cells and 80% of TSH-positive cells (Fig. 2, B and C). None of the cells staining for PRL, ACTH, or GH exhibited transgene expression (Fig. 2, D, E, and F). We cannot exclude the possibility that the transgene is expressed in a few somatotropes. Coexpression of  $\alpha$ -subunit and GH has been observed in human pituitary tumors and in normal human pituitary cells (26–29). Gonadotrope- and thyrotrope-specific transgene expression was also demonstrated in lines 8364 and 8588 (data not shown).

### Transgene Expression Responds to Changes in Thyroid Status

We tested whether the 4.6  $m\alpha$ - $\beta$ gal transgene was regulated by thyroid hormone. Groups of mice from the highest expressing transgenic line (8365) were placed into three groups ( $n = 6$ ). One group served as a euthyroid control and had mean  $T_4$  serum levels of  $3.2 \pm 0.3 \mu\text{g/dl}$  and mean  $T_3$  serum levels of  $23 \pm 4.6 \text{ ng/dl}$ . A second group was given L- $T_4$  in their drinking water for 28 days (hyperthyroid). This resulted in mean serum  $T_4$  and  $T_3$  levels of  $18 \pm 1.9 \mu\text{g/dl}$  and  $363 \pm 70 \text{ ng/dl}$ , respectively. The third group was radiothyroidectomized 167 days before the experiment to produce a hypothyroid state. The mean serum  $T_4$  levels were below the detectability of the assay ( $<1 \mu\text{g/dl}$ ) while the mean  $T_3$  levels were  $8.3 \pm 1.8 \text{ ng/dl}$ . The  $\alpha$ -subunit promoter activity was assessed in anterior pituitary gland homogenates using the chemiluminescent  $\beta$ -galactosidase assay. When pituitary extracts from non-transgenic mice were assayed, no detectable  $\beta$ -galactosidase activity could be measured. As shown in Fig. 3, a high level of promoter activity ( $118 \pm 11 \text{ ng/pituitary}$ ) was exhibited by the pituitaries from the control euthyroid group. Activity from the hypothyroid animals increased 230% ( $270 \pm 21 \text{ ng/pituitary}$ ) above the control group. Hyperthyroid animals exhibited a 43% decrease in activity ( $68 \pm 9 \text{ ng/pituitary}$ ) relative to the control group. There was a statistically significant difference between the groups ( $P < 0.001$ ) using the Kruskal-Wallis one-way analysis of variance on ranks. All pairwise multiple comparisons between groups were statistically significant ( $P < 0.05$ ) using the Student Newman-Keuls method. Thus, the transgene is subject to regulation in response to the thyroidal state.

### Low Levels of Transgene Expression Are Found in Some Adult Peripheral Tissues

A subset of the high-expressing transgenic lines was selected for further analysis. Extracts of kidney, heart, lung, liver, gonads, and brain were prepared from at least two individuals from lines 8365 and 8364. Express-

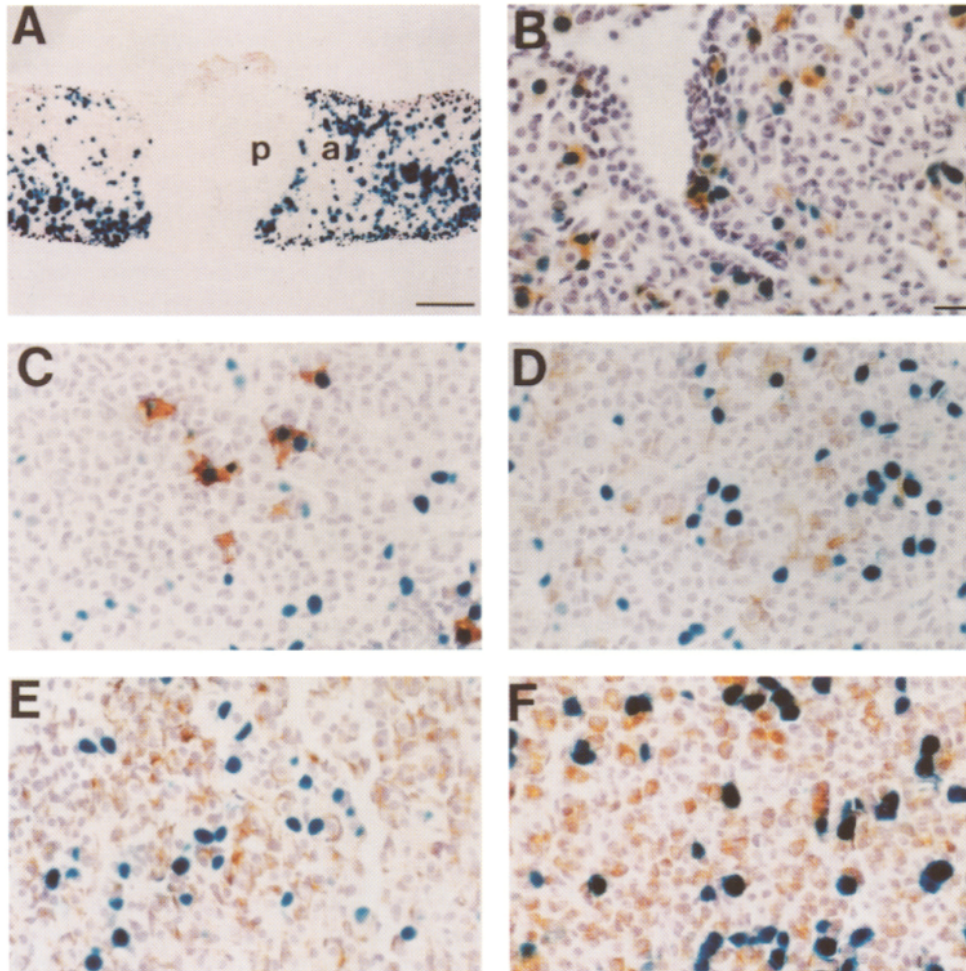

**Fig. 2.** Colocalization of 4.6 m $\alpha$ - $\beta$ gal Transgene Expression and TSH and LH Immunoreactivity in Adult Anterior Pituitary Glands

A pituitary frozen section from transgenic line 8612 was stained for  $\beta$ -galactosidase expression and counterstained with neutral red. High level  $\beta$ -galactosidase expression is detected by a blue precipitate found only in the nuclei of the anterior lobe (a) but not in the posterior (p) and intermediate lobes (panel A). Pituitaries from transgenic line 8365 were stained for  $\beta$ -galactosidase expression and embedded in paraffin, and sections were immunostained with antibodies against LH (panel B), TSH (C), ACTH (D), PRL (E), and GH (F). Transgene expression is evident only in cells immunostained for TSH and LH. *Magnification bars* shown in A and B represent 200 and 25  $\mu$ m, respectively. Magnification was constant for B-F.

sion was quantitated as nanomoles of the fluorescent product 4-methylumbelliferone generated per gram of tissue/h. In homogenates, the background level of  $\beta$ -galactosidase activity is characteristic of the tissue and can be significant. Enzyme activity levels that were less than 2-fold over background were not considered significant. Whereas pituitary expression in lines 8365 and 8364 was 200- to 100-fold over background, potentially significant peripheral tissue expression was noted only in the brain (5-fold) in line 8365 and the ovaries/oviducts in lines 8365 (14-fold) and 8364 (4-fold). No significant expression was noted in the kidney, heart, lung, liver, or testis of either line (data not shown).

Peripheral tissue expression was examined further in transgenic lines 8365, 8690, and 8364 using an X-gal histochemical assay on frozen sections. The nuclear localization of the reporter gene facilitated distinguish-

ing transgene expression from background  $\beta$ -galactosidase activity in the cytoplasm. A few scattered blue nuclei were noted in the kidneys and brains of all three lines and in the ovaries and oviducts from two of two tested lines (8365 and 8364). In 20- $\mu$ m frozen sections of kidney, expression was localized exclusively in the artery walls near the vascular pole of glomeruli. Four-micrometer frozen sections confirmed the localization to a subset of vascular wall cells in the afferent arterioles of glomeruli, possibly in granular cells, the major source of endocrine renin production (Fig. 4A). In the brain, expressing cells were located predominately in the arcuate hypothalamic nucleus and the cortex of all three lines and in the lateral septal nucleus of the highest expressing lines 8365 and 8690 (Fig. 4B). The level of transgene expression in the kidney and in these regions of the brain was much lower than the transgene expres-

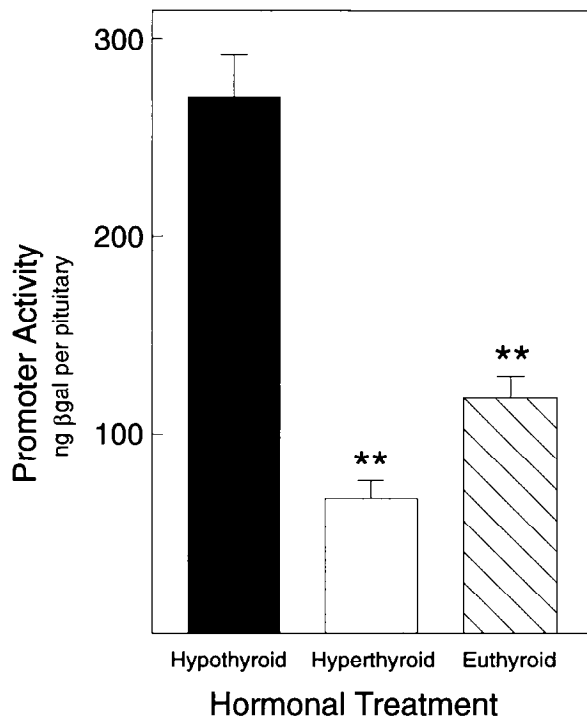

**Fig. 3.** Expression of the 4.6  $\alpha$ - $\beta$ gal Transgene Is Increased in Response to Hypothyroidism and Decreased in Hyperthyroid Mice

Groups of adult transgenic mice ( $n = 6$ ) were radiothyroidectomized (hypothyroid, *black bar*) or treated with  $L-T_4$  (hyperthyroid, *shaded bar*) as described in *Materials and Methods*. A control group was untreated (euthyroid, *striped bar*). Thyroidal status was confirmed by measurement of serum  $T_4$  and  $T_3$  levels. Anterior pituitaries were harvested and cell extracts were assayed for  $\beta$ -galactosidase activity and are expressed as nanograms of  $\beta$ -galactosidase per pituitary. Error bars represent the SEM. There was a statistically significant difference (\*\* between the groups ( $P < 0.05$ ) for all pairwise multiple comparisons using the Student-Newman-Keuls method.

sion in the pituitary gland (Fig. 4C). No transgene expression was detected in heart, lung, liver, and testis.

Expression of the endogenous  $\alpha$ -subunit gene in the brain, kidney, and ovary was examined by *in situ* hybridization. As expected, endogenous  $\alpha$ -subunit mRNA transcripts were readily detected in the anterior pituitary after 3 days exposure of emulsion-dipped slides (data not shown). Expression evident in the *pars tuberalis* of the pituitary also served as a positive control (Fig. 4D), but no significant endogenous gene expression was detected in the brain, ovary/oviduct, or kidney after 3 weeks exposure (data not shown).

$\alpha$ -Subunit expression, if present in these peripheral tissues, is below the limit of detection by our *in situ* hybridization assay. Nevertheless, transgene expression in the granular cells of the kidney provides a marker for purification of these cells (30).

#### Appropriate Developmental Onset of Transgene Expression in Rathke's Pouch

The  $\alpha$ -subunit mRNA is first detected in the developing rat embryo in the hypophyseal placode which becomes

Rathke's pouch (8, 9). Embryos were collected from transgenic lines 8365 and 8364 at embryonic day 8.5, 9.5, and 12.5 and examined for evidence of transgene expression. No expression was detected in the region of the developing pituitary in whole embryonic day 8.5 (e 85) embryos stained with X-gal (data not shown). Blue-staining cells were evident in essentially all of the cells of Rathke's pouch at e 9.5 (Fig. 5A). No background  $\beta$ -galactosidase activity was detected in C57BL/6J control littermate embryos. The morphology of Rathke's pouch in e 9.5 mouse embryos is comparable to the stage when  $\alpha$ -subunit is first detected in rat embryos, e 11 (8, 9, 31). This suggests that the transgene is activated between e 8.5 and e 9.5, as expected. At e 12.5, expression in the developing pituitary was much stronger. Blue-staining was detectable throughout Rathke's pouch, but the majority of staining appeared to be restricted to the ventral and anterior portion, in the rostral tip (Fig. 5, B and C).

#### Identification of Novel Regions of Endogenous $\alpha$ -Subunit Gene Expression in Developing Mice

In addition to transgene expression in the developing pituitary gland, low levels of transgene expression were detected in several other regions at each embryonic stage examined. In transgenic lines 8365 and 8364, expression was detected at e 9.5 in the trigeminal area in the region of condensing mesenchyme (Fig. 5A) and, at much lower levels, in the umbilical region. At e 12.5, low levels of expression were detectable in the condensing mesenchyme in the region of forming extraocular muscle (Fig. 5, B and E), the first branchial pouch, a portion of the trigeminal area, the medial wall of the vestibular or cochlear apparatus, the marginal zone of the spinal cord, the connective tissue core of the genital tubercle, and pancreatic primordium (Table 2). In line 8364, transgene expression was also detected in cells present in the mesenchyme near the olfactory epithelium, likely to be neurons migrating from this region to the hypothalamus (data not shown). Transgene expression patterns were reproducible within a line and identical in lines 8364 and 8365 except for some minor differences such as the expression in the olfactory region. At e 12.5, expression in Rathke's pouch was significantly greater than expression in any of these peripheral regions.

To compare endogenous expression with transgene expression at e 12.5, *in situ* hybridization was performed on embryo sections from C57BL/6J and transgenic line 8364. Endogenous  $\alpha$ -subunit mRNA was detected in the condensing mesenchyme in the region of forming extraocular muscle (Fig. 5F) and in cells present in the mesenchyme near the olfactory epithelium (Fig 5D). These are the same regions in which transgene expression was evident. As noted for the transgene, the level of expression in these peripheral regions was much lower than the level of expression in the developing pituitary.

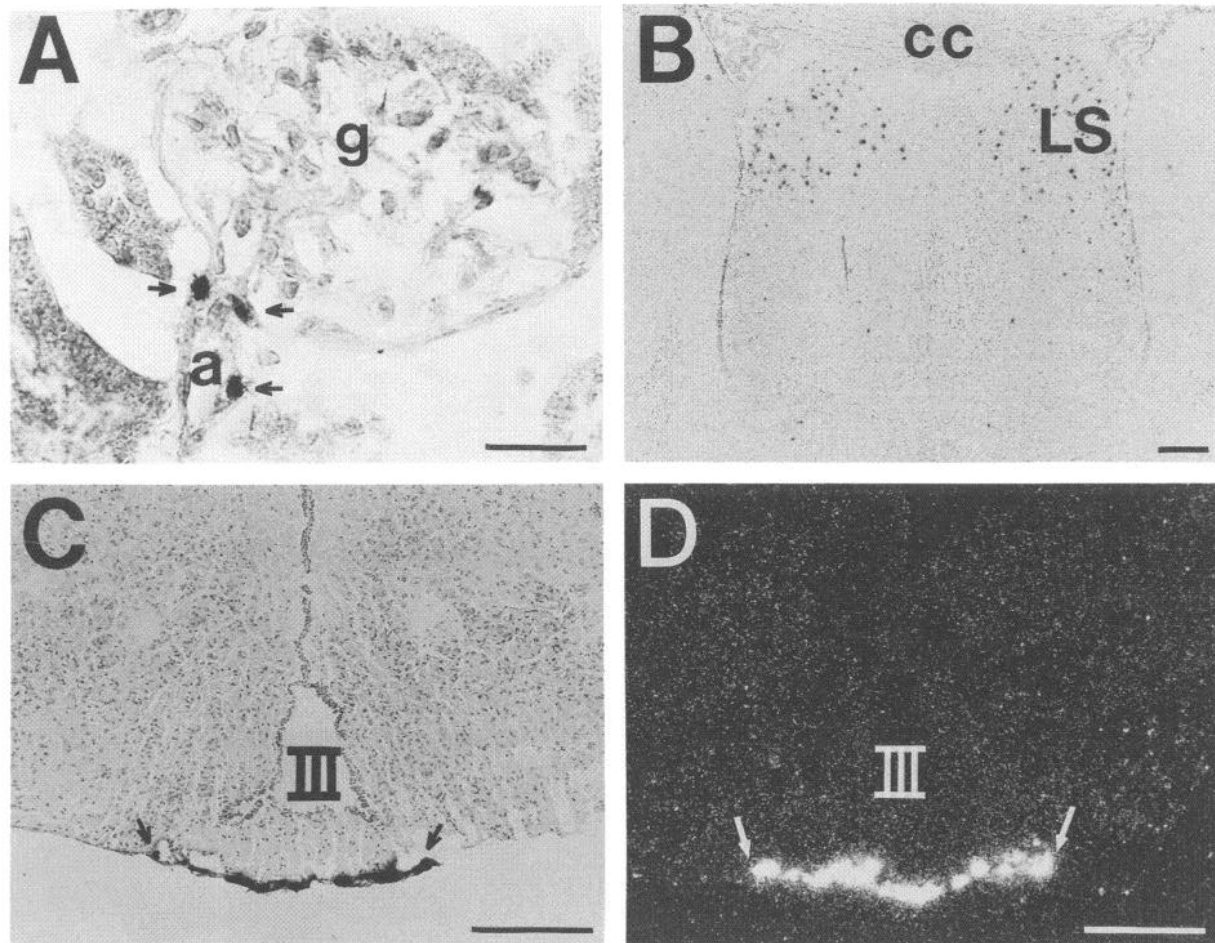

**Fig. 4.** The 4.6  $m\alpha$ - $\beta$ gal Transgene Is Expressed at Much Lower Levels in Adult Peripheral Tissues Than in the Anterior Pituitary Gland

Frozen brain and kidney sections from transgenic line 8365 were stained for  $\beta$ -galactosidase activity by X-gal histochemistry and counterstained with 0.5% neutral red. In the kidney (panel A), expression was restricted to the vasculature in close proximity to the vascular pole of glomeruli (g). Here a longitudinal section through an afferent arteriole (a) demonstrates three positive vascular wall cells, possibly granular cells (arrows). Transgene expression is also evident in the lateral septal nucleus of the brain (LS) which lies below the corpus callosum (cc) (panel B). Transgene expression in the pituitary stalk (pars tuberalis, arrows), located just below the median eminence of the hypothalamus and the third ventricle (III), is evident in a frozen brain section of line 8365 after X-gal histochemistry (panel C). Expression of the endogenous  $\alpha$ -subunit gene was detected in the pars tuberalis (arrows) by *in situ* hybridization histochemical analysis of an adjacent brain section with a mouse  $\alpha$ -subunit cDNA antisense riboprobe (panel D, darkfield). No endogenous mouse  $\alpha$ -subunit transcripts were found in other areas of the brain. The magnification bars represent 20  $\mu$ m (panel A) and 250  $\mu$ m (panels B-D).

#### DNA Sequences Between $-4.6$ and $-2.7$ kb Are Necessary for High Level Expression of $\alpha$ -Subunit in Whole Animals

Sequences within the 480 bp proximal to the mouse  $\alpha$ -subunit transcription start site are sufficient for expression in thyrotrope- and gonadotrope-derived cell lines (11–13). Lower levels of expression in somatotrope cell lines suggest that 480 bp is sufficient for cell specificity (12). To determine whether 480 bp can confer cell-specific expression in whole animals, 480 bp of the mouse  $\alpha$ -subunit 5'-flank were joined within exon 1 to the nuclear-localized *lacZ* reporter gene (0.48  $m\alpha$ - $\beta$ gal,

Fig. 1). The integrity of the construct was confirmed by transient transfection into  $\alpha$ TSH cells. Both the 5.0  $m\alpha$ - $\beta$ gal and 0.48  $m\alpha$ - $\beta$ gal constructs gave high levels of expression when compared to the promoterless reporter construct. No significant difference was noted in promoter activity between the two constructs (Fig. 6).

Eleven transgenic founders were generated with the 0.48  $m\alpha$ - $\beta$ gal construct. The fluorometric assay was used to quantify  $\beta$ -galactosidase activity in extracts prepared from a portion of the anterior lobe from these founders. For analysis of cell specificity, the remainder of the pituitary was incubated in X-gal and embedded in paraffin, and sections were immunostained. In order

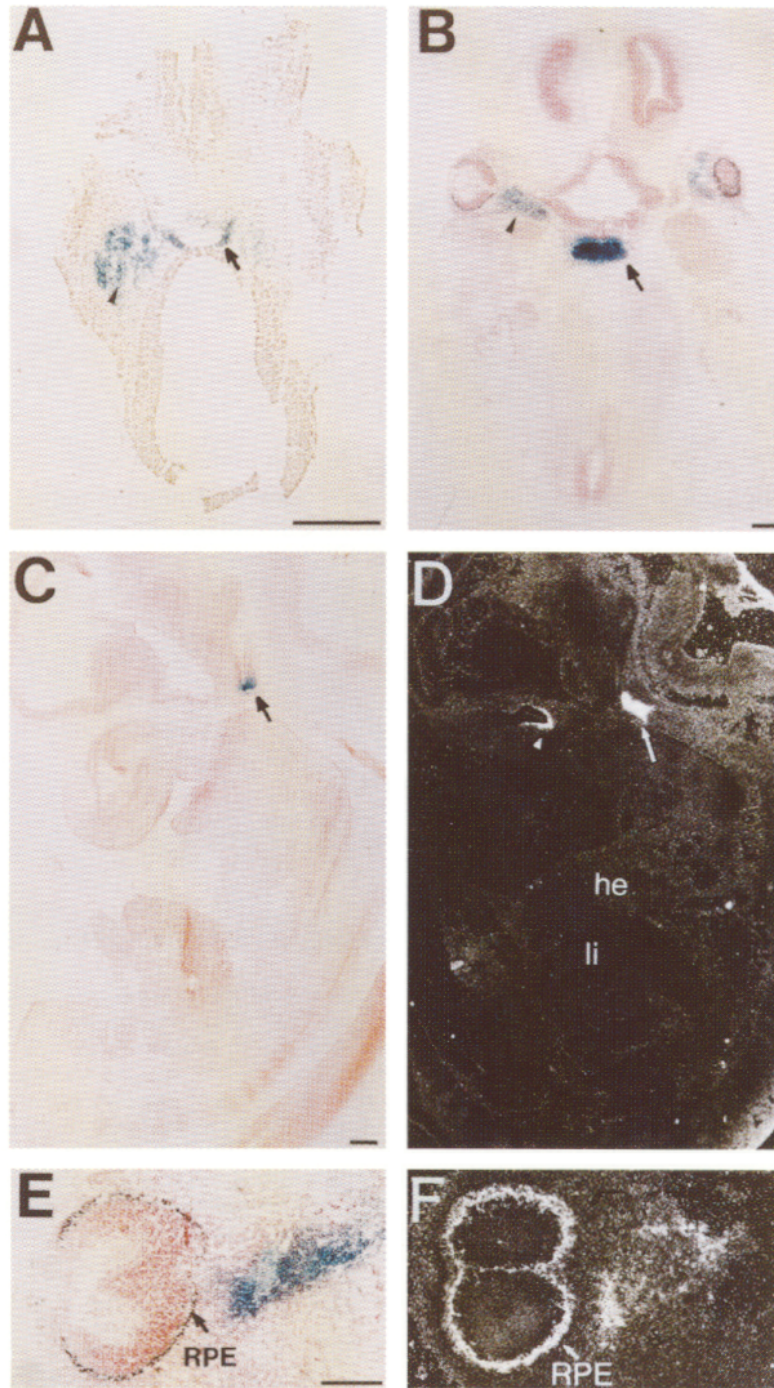

**Fig. 5.** Appropriate Expression of the 4.6  $m\alpha$ - $\beta$ gal Transgene in Rathke's Pouch and Novel Embryonic Tissues

Frozen transverse sections through the cephalic region of e 9.5 (line 8365, panel A) and e 12.5 embryos (line 8364, panel B) were stained for  $\beta$ -galactosidase expression by X-gal histochemistry and counterstained with 0.5% neutral red. Expression was detected in Rathke's pouch at both stages (*arrows*), in the trigeminal nucleus at e 9.5 (*arrowhead*) and in condensing mesenchyme in the region of forming extraocular muscles at e 12.5 (*arrowhead*). X-gal histochemical staining of a sagittal section of an e 12.5 embryo from transgenic line 8364 reveals expression throughout Rathke's pouch, with predominant expression in the ventral anterior portion of the rostral tip (*arrow*, Panel C). *In situ* hybridization with an  $\alpha$ -subunit cDNA antisense riboprobe was carried out in sagittal sections of a C57BL/6J embryo, e 12.5, and photographed in darkfield (panel D). Endogenous  $\alpha$ -subunit expression was detected in Rathke's pouch (*arrow*) and in cells present in the mesenchyme region near the olfactory epithelium (*arrowhead*). These cells are likely to be neurons migrating from this region to the hypothalamus. For orientation, heart (he) and liver (li) are indicated. At higher magnification, expression of the transgene in line 8364 at e 12.5 is evident by the *blue* precipitate associated with the condensing mesenchyme in the region of forming extraocular muscles at the level of the optic fissure (panel E). The pigmented epithelial cells of the retina contain melanin granules that appear black in brightfield and white in darkfield (RPE). Expression of the endogenous  $\alpha$ -subunit gene in the same region was confirmed in an adjacent section by *in situ* hybridization

**Table 2.** Embryonic Expression in Transgenic Lines 8365 and 8364

| Region                                                  | Level of Expression <sup>a</sup> |                |
|---------------------------------------------------------|----------------------------------|----------------|
|                                                         | e 9.5                            | e 12.5         |
| Rathke's pouch                                          | ++                               | ++++++         |
| Trigeminal nucleus                                      | ++                               | +              |
| Umbilical region                                        | +                                | –              |
| Condensing mesenchyme in the extra-ocular muscle region | –                                | +++            |
| First branchial arch                                    | –                                | +              |
| Medial wall of the vestibular apparatus                 | –                                | +              |
| Olfactory region                                        | –                                | + <sup>b</sup> |
| Marginal zone of the spinal cord                        | –                                | ++             |
| Genital tubercle                                        | –                                | +              |
| Pancreatic primordium                                   | –                                | +              |

<sup>a</sup> The intensity of  $\beta$ -galactosidase staining in frozen sections was evaluated subjectively. Weak staining is scored as + and intense staining as +++++.

<sup>b</sup> Expression was observed in transgenic line 8364 but not in line 8365.

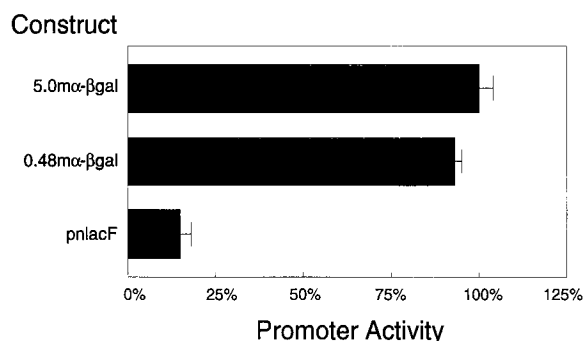**Fig. 6.** Constructs with 5 kb or 480 bp of the Mouse  $\alpha$ -Subunit 5'-Flanking Sequences Exhibit Equivalent Promoter Activity in  $\alpha$ TSH Cells

$\alpha$ TSH cells ( $2-3 \times 10^6$ ) were transiently transfected in quadruplicate with 20  $\mu$ g of a  $\beta$ -galactosidase expression vector containing either 5 kb or 480 bp of the  $\alpha$ -subunit 5'-flanking regions or no promoter (pnlacF, vertical axis). One microgram of the luciferase expression vector pA<sub>3</sub>RSVLUC was cotransfected. After 24 h, cells were harvested and  $\beta$ -galactosidase and luciferase activities were measured as described in *Materials and Methods*. The results of four transfections are presented as the mean  $\pm$  SEM, normalized to the percent activity relative to the 5.0 m $\alpha$ - $\beta$ gal construct.

for staining to be visible, the concentration of X-gal was 10-fold higher than that used to stain pituitaries from mice with the 4.6 m $\alpha$ - $\beta$ gal construct. In four founder animals tested, transgene expression was localized to cells expressing LH or TSH (Fig. 7) and was not present in cells expressing PRL, GH, or ACTH. In general, the 0.48 m $\alpha$ - $\beta$ gal mice had fewer X-gal-stained gonado-

tropes and thyrotrope cells than the 4.6 m $\alpha$ - $\beta$ gal mice, and the staining was lighter. The level of  $\beta$ -galactosidase activity in the 0.48 m $\alpha$ - $\beta$ gal transgenic mice was compared to the activity measured in extracts prepared the same day from the 4.6 m $\alpha$ - $\beta$ gal transgenic line 8365 (Fig. 8). Pituitaries from C57BL/6J mice served as negative controls. All 11 0.48 m $\alpha$ - $\beta$ gal founders exhibited less than 10% of the expression levels observed in line 8365. In contrast, only three of the eight 4.6 m $\alpha$ - $\beta$ gal transgenic lines had  $\beta$ -galactosidase levels in the low range. It is clear that although these constructs confer equivalent levels of expression in transient transfection, they have dramatically different activities in transgenic mice. No transgene expression was detected in X-gal-stained frozen sections of kidney, liver, heart, lung, or testis (data not shown).

In order to determine the location of enhancer sequences present in the 4.6 kb and missing in 480 bp, transgenes with 2.7 kb and 1.49 kb of the mouse  $\alpha$ -subunit 5'-flank were generated (Fig. 1). Eight founders containing the 2.7 m $\alpha$ - $\beta$ gal transgene and 10 founders containing the 1.49 m $\alpha$ - $\beta$ gal transgene were analyzed by fluorometric assay and immunostaining as described for the 0.48 m $\alpha$ - $\beta$ gal transgenic mice. The majority of these founders also expressed the transgene at a level below 10% that observed in line 8365 (Fig. 8). Cell-specific expression in both gonadotropes and thyrotropes was confirmed in at least two founder animals for each construct (data not shown).

Application of the one-way analysis of variance test confirmed a statistically significant effect of the 5'-flanking region on transgene expression ( $P < 0.0007$ ). Expression of the transgenes with 2.7, 1.49, and 0.48 kb of 5'-flanking DNA did not differ significantly ( $P < 0.60$ ). Pairwise multiple comparisons between groups using the Student Newman-Keuls method demonstrated that expression of the 4.6 m $\alpha$ - $\beta$ gal transgene was statistically different from each of the others ( $P < 0.05$ ). Thus, sequences necessary for high level expression in both gonadotropes and thyrotropes of transgenic mice lie between  $-4.6$  and  $-2.7$  kb. This region is likely to contain an enhancer, although we have not demonstrated position- and orientation-independent function.

## DISCUSSION

This is the first *in vivo* demonstration of  $\alpha$ -subunit transgene expression in both pituitary thyrotrope and gonadotrope cells. Most 4.6 m $\alpha$ - $\beta$ gal transgenic lines exhibited a high level of  $\beta$ -galactosidase reporter gene expression, and the transgene was expressed in 80–90% of the cells immunostained with LH and TSH.



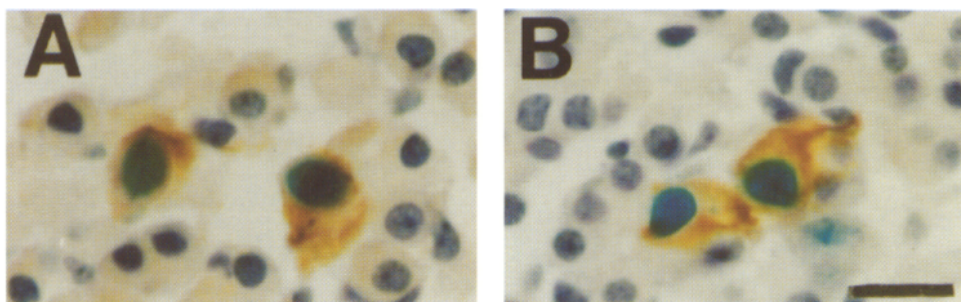

**Fig. 7.** Expression of the 0.48  $m\alpha$ - $\beta$ gal Transgene Colocalizes with LH and TSH Immunoreactivity

The pituitary gland from a transgenic founder animal carrying the 0.48  $m\alpha$ - $\beta$ gal construct was stained for  $\beta$ -galactosidase expression and embedded in paraffin, and sections were immunostained with antibodies against pituitary hormones. Transgene expression was evident only in cells immunostained for LH (panel A) or TSH (panel B). The magnification in panels A and B is the same, and the magnification bar represents 15  $\mu$ m (panel B).

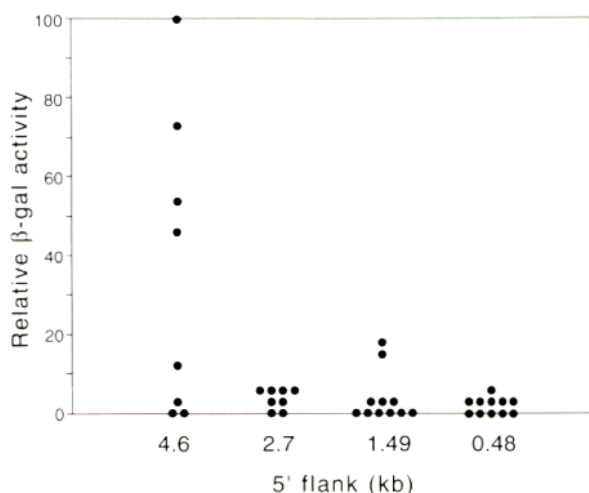

**Fig. 8.** Sequences Between  $-4.6$  and  $-2.7$  kb of the Mouse  $\alpha$ -Subunit 5'-Flank Are Necessary for High Level Expression in Transgenic Mice

$\beta$ -Galactosidase activity was measured in duplicate aliquots of individual pituitary gland homogenates by fluorometric assay and normalized to protein concentrations. The analysis was performed on transgenic founders carrying the 2.7  $m\alpha$ - $\beta$ gal, 1.49  $m\alpha$ - $\beta$ gal, and 0.48  $m\alpha$ - $\beta$ gal transgenic constructs and transgenic progeny of 4.6  $m\alpha$ - $\beta$ gal lines. In transgenic line 8365, the average  $\beta$ -galactosidase activity was 359 U enzyme per gram of protein. The background level of  $\beta$ -galactosidase activity in nontransgenic C57BL/6J pituitaries, 3.5 U/g, was subtracted from the readings for each transgenic pituitary, and values are shown as a percent of the activity of transgenic line 8365.

Based on transfection of  $\alpha$ TSH cells and thyrotrope tumor cells, we predicted that 480 bp of 5'-flanking sequences would be sufficient to direct appropriate cell-specific expression in gonadotropes and thyrotropes (10–13). Despite the low level of expression obtained from transgenes truncated to  $-480$  bp, thyrotrope- and gonadotrope-specific expression was retained, confirming the cell culture study. This finding contrasts with transgene experiments in which 1.6 and 1.8 kb of

human  $\alpha$ -subunit 5'-flank resulted in only gonadotrope expression (14, 16). Although a high degree of DNA sequence similarity exists between the mouse and human  $\alpha$ -subunit 5'-flanking regions ( $>60\%$  over approximately 500 bp), species differences may account for the lack of expression of the human promoter in the thyrotropes of transgenic mice. This idea is supported by other species-specific differences in  $\alpha$ -subunit expression (11, 20, 23).

In transgenic mice a dramatic reduction in the level of reporter gene expression was observed with 480 bp compared to 4.6 kb of the mouse  $\alpha$ -subunit 5'-flank. Deletion analysis in transgenic mice demonstrated that sequences between  $-4.6$  kb and  $-2.7$  kb are critical for high level expression in both gonadotropes and thyrotropes. In contrast, 5 kb and 480 bp yield identical levels of reporter expression in  $\alpha$ TSH cells. Differences in the requirements for expression in cell lines and transgenic mice have been reported for other genes (32–34). There are several possible explanations for the inactivity of the enhancer element in the cell lines. Chromatin structure may be required for enhancer activity, necessitating the generation of stable transformants (35). Alternatively, the  $\alpha$ TSH cells may lack one or more trans-acting factors that are critical for function of the enhancer sequences between  $-4.6$  and  $-2.7$  kb. The  $\alpha$ TSH cell line and the transplantable tumor, MGH101A, from which it was derived, differ from the original thyrotrope tumor, MGH101, in that they do not express the TSH  $\beta$ -subunit gene, although they continue to express the  $\alpha$ -subunit gene (36, 37). Thus, a change in transcription factor activity through altered gene expression or covalent modification could account for both the lack of  $\alpha$ -subunit enhancer recognition and the lack of TSH  $\beta$ -subunit transcription in the cells. There are other examples of transformed cells with alterations in differentiated gene expression that may result from changes in transcription factor expression (38–40)

Expression of pituitary  $\alpha$ -subunit is directly regulated at the transcription level by several hormones, including GnRH, TRH, and thyroid hormone. Distinct DNA se-

quences appear to mediate these responses. Many regulatory elements within 500 bp of the human, rat, or mouse  $\alpha$ -subunit promoters have been identified in cell culture studies (12, 41–45). In transgenic mice both the bovine and human  $\alpha$ -subunit promoters exhibit GnRH and estradiol responsiveness, but neither promoter exhibited thyroid hormone regulation (14). We demonstrated thyroid hormone regulation of the transgene containing 4.6 kb of mouse  $\alpha$ -subunit 5'-flank. A 75% decrease in expression was observed in mice treated with  $T_4$  compared to the hypothyroid state. This transgene response correlates with the changes seen in  $\alpha$ -subunit mRNA levels in pituitaries (decrease of 40–50%) and in thyrotropic tumors (decrease of 85%) in similarly treated mice (46). This suggests that sequences within 4.6 kb of the mouse  $\alpha$ -subunit promoter contain all of the *cis*-acting sequences necessary to confer the thyroid hormone response. This is consistent with transient transfection experiments in TtT-97 thyrotropic tumor cells in which we localized a thyroid-inhibitory response to a region between –62 and +43 bp of the mouse  $\alpha$ -subunit promoter (12).

The developmental onset of transgene expression between e 8.5 and e 9.5 corresponds to the timing expected from previous studies of the ontogeny of  $\alpha$ -subunit gene expression (8, 9). Transgene expression continued to follow the expected pattern;  $\beta$ -galactosidase levels increased and became more restricted to the ventral and anterior region of Rathke's pouch after e 9.5. The spatially restricted expression we observed corresponds with that reported for the endogenous  $\alpha$ -subunit gene (8, 9, 47). This indicates that 4.6 kb of the mouse  $\alpha$ -subunit 5'-flank also contains the *cis*-acting sequences necessary for developmental regulation. Thus, we have defined DNA sequences useful for targeting expression of other genes to the pituitary primordium.

Transcription of  $\alpha$ -subunit during ontogeny has only been reported in Rathke's pouch (8, 9). Although we found the majority of transgene expression in Rathke's pouch, significant levels of expression were also present in other regions, including the extraocular and olfactory regions. Using *in situ* hybridization, we demonstrated that both of these areas of transgene expression correlate with regions of endogenous  $\alpha$ -subunit gene expression. The reproducibility of low level transgene expression in other areas suggests that  $\alpha$ -subunit may be expressed in these other regions at a level undetectable by the *in situ* hybridization assay.

If  $\alpha$ -subunit transcripts are translated in Rathke's pouch or in the olfactory and extraocular regions,  $\alpha$ -subunit may have a biological role in early development. In adult pituitary glands, the  $\alpha$ -subunit is produced in excess of the  $\beta$ -subunits, and it is secreted as free  $\alpha$ -subunit. Free bovine  $\alpha$ -subunit has an additional O-linked oligosaccharide which prevents its association with  $\beta$ -subunits (48). Cell culture studies suggested that free  $\alpha$ -subunit can act as an inducer of differentiation (49), although no  $\alpha$ -subunit receptor has been identified. The presence of transcripts in the olfactory region and

pituitary primordium is intriguing in light of the observation that GnRH cells develop from a group of progenitor cells in the olfactory placode at e 11 and migrate across the nasal septum into the forebrain and toward the hypothalamus (50–52). A role for  $\alpha$ -subunit in differentiation or migration of brain, sensory, and/or pituitary gland cells will be tested directly by targeted disruption of the  $\alpha$ -subunit gene by homologous recombination.

The expression of the  $\alpha$ -subunit transgene in the brain was consistently observed in the cortex, lateral septal nucleus, and arcuate nucleus. The apparent lack of  $\alpha$ -subunit mRNA transcripts in those regions may be attributable to insensitivity of the *in situ* hybridization assay relative to the  $\beta$ -galactosidase assay. The level of transgene expression in the brain was lower than that observed in the extraocular region of the developing embryo, where endogenous  $\alpha$ -subunit transcripts were within the limit of detection. We cannot rule out the possibility that the transgene lacks DNA sequences that repress expression in the brain; however, the presence of immunoreactive LH, TSH, and  $\alpha$ -subunit in the brain, and particularly the hypothalamus, has been reported (53–56). Other studies also were unable to detect  $\alpha$ -subunit mRNA in brain and concluded that pituitary hormones might be transported into the brain (56). Our observations reopen the possibility that  $\alpha$ -subunit is transcribed in the brain.

Our transgenic mouse studies have confirmed that 480 bp of promoter proximal regions are sufficient for cell-specific expression of the  $\alpha$ -subunit in thyrotropes and gonadotropes. However, we also localized an element between –4.6 and –2.7 kb that exhibits enhancer activity in both gonadotrope and thyrotrope cells *in vivo* but is inactive in cell culture studies. Sequences important for hormonal regulation and temporal specific expression were contained within 4.6 kb as well. These studies of transgene expression in development led to identification of novel regions of endogenous  $\alpha$ -subunit gene expression in developing embryos. The 4.6-kb fragment described will provide an effective tool for direction of foreign gene expression in the anterior pituitary gland.

## MATERIALS AND METHODS

### Construction of the Mouse $\alpha$ -Subunit- $\beta$ -Galactosidase Clones

A 3.2-kb *Hind*III to *Bam*HI fragment containing sequences from –5.0 kb to –1.7 kb of the mouse  $\alpha$ -subunit gene was excised from a 8.5-kb *Hind*III to *Sal*I genomic clone (57), and a 1744-bp *Bam*HI to *Hind*III fragment containing genomic sequences from –1.7 kb to +43 bp was excised from a luciferase reporter clone (58). These two fragments were subcloned into the *Hind*III site of pGEM7Zf+ to generate a –5 kb to +43 bp *Hind*III to *Hind*III insert. This fragment was subsequently isolated, incubated with AMV reverse transcriptase (Promega, Madison, WI) and all four deoxynucleoside triphosphates to produce blunt ends, and subcloned into the *Sma*I site of the  $\beta$ -galactosidase expression vector pnlacF (kindly provided by

Jacques Peschon and Richard Palmiter). This vector contains the *Escherichia coli lac Z* gene modified to encode the SV40 T antigen nuclear localization signal at the amino terminus. Sequences from the mouse protamine-1 gene present at the 3'-end of the p<sub>lacF</sub> vector provide 3'-untranslated sequences, an intron, and polyadenylation signal (59). Similarly, the -480 to +43 *HindIII* genomic fragment was cloned into the *SmaI* site of p<sub>lacF</sub>. The integrity of the recombinant expression clones was verified by restriction mapping, and the clone junctions were confirmed by DNA sequence analysis.

The 5.0  $m\alpha$ - $\beta$ gal clone and the 0.48  $m\alpha$ - $\beta$ gal clone were digested with *KpnI* and *HindIII* to remove plasmid sequences and produce the transgenes 4.6  $m\alpha$ - $\beta$ gal and 0.48  $m\alpha$ - $\beta$ gal. The 5.0  $m\alpha$ - $\beta$ gal plasmid was also digested with *XhoI* and *HindIII* to generate the 2.7  $m\alpha$ - $\beta$ gal transgene and with *SphI* to generate the 1.49  $m\alpha$ - $\beta$ gal transgene. The fragments were isolated by agarose gel electrophoresis and purified for microinjection with either the Nucleobond AX plasmid kit (The Nest Group, Inc., Southborough, MA) or with the FMC SpinBind DNA Recovery System for Agarose Gels (FMC BioProducts, Rockland, ME).

### Generation and Breeding of Transgenic Mice

The purified inserts were microinjected into F2 hybrid zygotes from C57BL/6J  $\times$  SJL/J parents at a total concentration of approximately 2–3 ng/ $\mu$ l. After overnight incubation, embryos at the two cell stage were transferred to day 0.5 postcoitum pseudopregnant CD-1 females. The 4.6  $m\alpha$ - $\beta$ gal transgenic founders were mated to C57BL/6J mice to establish lines.

C57BL/6J and SJL/J mice (The Jackson Laboratory, Bar Harbor, ME) and CD-1 mice (Charles River, Wilmington, MA) were bred at the University of Michigan. All procedures using mice were approved by the University of Michigan Committee on Use and Care of Animals. All experiments were conducted in accord with the principles and procedures outlined in the NIH Guidelines for the Care and Use of Experimental Animals.

### Identification of Transgenic Mice

Genomic DNA prepared from tail biopsies was screened for the presence of the transgene by polymerase chain reaction (PCR) (60). A 30 bp sense oligo (5' TTC ACT GGC CGT CGT TTT ACA ACG TCG TGA 3') and a 30-bp antisense oligo (5' ATT TGA GCG AGT AAC AAC CCG TCG GAT TCT 3') were used to amplify a 364-bp fragment of the  $\beta$ -galactosidase gene corresponding to nucleotides 15–379 (61). The PCR reactions were carried out under standard conditions using 100–200 ng genomic DNA, 0.5 pmol/ $\mu$ l primers, 2.5 mM MgCl<sub>2</sub>, and 1.7 U Taq DNA polymerase per reaction (62). Reactions proceeded for 30 cycles of denaturation at 92 C for 30 sec, annealing at 60 C for 1.5 min, extension at 72 C for 2 min, and final extension at 72 C for 10 min.

To estimate transgene copy numbers and to confirm the integrity of the transgene, Southern blots were performed on transgenic mice identified by PCR. Mouse tail genomic DNA (10  $\mu$ g) was digested overnight in the presence of 4 mM spermidine. The DNA fragments were separated by electrophoresis in an agarose gel, transferred to a nylon filter (BioRad, Richmond, CA), and attached by cross-linking with UV light. The p<sub>lacF</sub> plasmid was linearized and radiolabeled by random priming for use as a probe. Hybridization was carried out at 65 C overnight in 7% sodium dodecyl sulfate, 0.5 M Na<sub>2</sub>HPO<sub>4</sub>, and 1 mM EDTA (pH 7.3). Filters were washed at 57 C to a final stringency of 0.1  $\times$  SSC, 0.1% sodium dodecyl sulfate (1  $\times$  SSC consists of 0.5 M NaCl, 0.015 M sodium citrate, pH 7.0). Copy number standards were prepared by mixing the appropriate amount of microinjection solution with genomic DNA from a nontransgenic mouse.

### $\beta$ -Galactosidase Fluorometric Assays

Transgene expression was quantitated in tissue extracts using a fluorometric assay for  $\beta$ -galactosidase. Individual pituitary

glands from 4.6  $m\alpha$ - $\beta$ gal transgenic mice were homogenized in 1 ml 250 mM Tris-Cl, pH 8, using Dounce homogenizers. Samples were freeze-thawed by incubation at 37 C and dry ice alternately for three cycles, and centrifuged for 10 min. Forty microliters of each supernatant were combined with 160  $\mu$ l of a reaction mixture containing 25 mM Tris-Cl, pH 7.5, 125 mM NaCl, 2 mM MgCl<sub>2</sub>, 12 mM 2-mercaptoethanol, and the substrate, 0.3 mM 4-methylumbelliferyl- $\beta$ -D-galactoside (Sigma, St. Louis, MO). The reactions were incubated for 30 min at 37 C, stopped by addition of 50  $\mu$ l 25% trichloroacetic acid, placed on ice, and centrifuged. Twenty or 40  $\mu$ l of each supernatant were diluted in 2 ml of a pH 10.7 buffer containing 133 mM glycine and 83 mM Na<sub>2</sub>CO<sub>3</sub>. Fluorescence was measured using a TKO Dedicated Mini Fluorometer (Hofer Scientific Instruments, San Francisco, CA). A standard curve was prepared using 50–175 nM of a methylumbelliferone standard diluted in the glycine carbonate reagent. Liver, heart, lung, testis, ovary, and brain homogenates were prepared and analyzed as described for the pituitaries except 10% tissue homogenates (grams per ml) were prepared using a Polytron (Brinkmann Instruments, Westbury, NY). Tissues from two mice from each transgenic line were analyzed, fluorometric readings were averaged, and background values were subtracted. Only measurements that were more than 2-fold greater than background were considered significant.

Modifications in the  $\beta$ -galactosidase fluorometric assay were made to facilitate quantification of transgene expression in founder mice. A section of the anterior lobe of the pituitary was excised using a scalpel and homogenized for up to 10 sec in 0.5 ml 250 mM Tris-Cl, pH 8, by sonication with cooling on ice. The remainder of the pituitary gland was processed for immunohistochemistry. Extracts were also prepared from progeny of line 8365 for comparison. Forty microliters of each homogenate were combined with 160  $\mu$ l of a modified reaction cocktail containing 1.8 mM 4-methylumbelliferyl- $\beta$ -D-galactoside. A standard curve was prepared using known amounts of  $\beta$ -galactosidase enzyme (5.0  $\times$  10<sup>-3</sup> to 5.0  $\times$  10<sup>-5</sup> U) (Sigma). Reactions were incubated for 4 h at 37 C, stopped by addition of 25% trichloroacetic acid on ice, and centrifuged. Forty microliters of each supernatant were diluted as above and fluorescence was measured with an American Instruments fluorometer (American Instruments Co., Inc., Silver Spring, MD) modified by D. Ballou and G. S. Ford (Department of Biological Chemistry, University of Michigan, Ann Arbor, MI). Reactions were performed in duplicate, fluorometric readings were averaged, and C57BL/6J background levels were subtracted.

$\beta$ -Galactosidase activity was normalized for the amount of protein in each homogenate. The Bradford protein assay (63) was performed with the Coomassie brilliant blue dye reagent (BioRad) on 15–30  $\mu$ l homogenate in microtiter plates as described (BioRad Laboratories, Hercules, CA). Absorbance of the samples and the BSA protein standard was measured at 630 nm using an EL311sx Auto Reader (Bio-Tek Instruments, Winooski, VT).

### Histology and Immunohistochemistry on Adult Pituitary Gland and Peripheral Tissues

Pituitaries and peripheral tissues were removed and frozen immediately in OCT (Miles Scientific, Elkhart, IN) on dry ice. Brains were frozen whole in 2-methyl butane at -35/-40 C for 30 sec and stored at -70 C. Twenty micrometer sections, and 4- $\mu$ m sections of kidney, were cut in a cryostat (Bright Instrument Company, Huntingdon, England) and mounted on poly-L-lysine-coated slides.

Sections were fixed for 5 min in 0.2% glutaraldehyde, containing 0.1 M NaH<sub>2</sub>PO<sub>4</sub> (pH 7.3), 5 mM EGTA, and 2 mM MgCl<sub>2</sub>, washed three times in wash buffer [0.1 M NaH<sub>2</sub>PO<sub>4</sub> (pH 7.3), 2 mM MgCl<sub>2</sub>, 0.02% NP-40], and incubated at 37 C overnight in an X-Gal solution containing 1 mg/ml X-Gal (Boehringer Mannheim, Indianapolis, IN), 5 mM K<sub>3</sub>Fe(CN)<sub>6</sub>, and 5 mM K<sub>4</sub>Fe(CN)<sub>6</sub>·3H<sub>2</sub>O in wash buffer (above). The counterstain was 0.5% neutral red (Sigma).

The cell specificity of transgene expression was evaluated by X-Gal enzymatic assay followed by immunohistochemistry for individual pituitary hormones. Pituitaries were fixed for 1 h in 4% paraformaldehyde in pH 7.2 sodium phosphate buffer and incubated at room temperature overnight in an X-Gal solution as above, except that X-Gal was reduced to 0.1 mg/ml for pituitaries from the 4.6  $m\alpha$ - $\beta$ gal transgenic lines. After 2–4 h postfixation in the buffered paraformaldehyde, the samples were embedded in paraffin and 3- to 4- $\mu$ m sections were prepared. Immunostaining was performed with polyclonal antisera against rat pituitary PRL (1:2000, AFP-10505B), rat GH (1:1000, AFP411S), rat LH $\beta$  (1:2000, AFP22238790GP0LHB), rat TSH $\beta$  (1:1000 AFP1274789) (National Hormone and Pituitary Program, NIDDK, Bethesda, MD), and human ACTH (1:1000) (Dako, Santa Barbara, CA). Biotinylated secondary antibodies were used in conjunction with avidin and biotinylated peroxidase (Vectastain guinea pig, rabbit, and human kits, Vector Laboratories, Burlingame, CA) with diaminobenzidine as the chromogen. Normal serum was substituted for the primary antibody in negative controls. Sections were counterstained with Gill's triple strength hematoxylin (Fisher, Pittsburgh, PA). Cell counts were performed as previously described (15).

### Thyroid Hormone Regulation

To assess transgene response to thyroid status, groups of transgenic mice from line 8365 ( $n = 6$  per group) were rendered hypothyroid, hyperthyroid, or left untreated. Radiothyroidectomy by ip injection of 150  $\mu$ Ci Na<sup>131</sup>I (New England Nuclear Corp., Boston, MA) was performed 167 days before experimentation to produce hypothyroid mice. Another group of animals were administered L-T<sub>4</sub> (5 mg/liter in 0.75% EtOH) (Sigma) in their drinking water for 28 days (hyperthyroid), and one group served as an untreated control (euthyroid). Mice were anesthetized by methoxyflurane inhalation and killed by cervical dislocation. Trunk blood was collected and serum was assayed for T<sub>4</sub> and T<sub>3</sub> by RIA (64). Anterior pituitary glands were collected in microfuge tubes containing 250  $\mu$ l cell lysis buffer (100 mM potassium phosphate, pH 7.8, 0.2% Triton X-100, and 1 mM dithiothreitol) and homogenized with a pestle. Extracts were prepared by subjecting tissue homogenates to three cycles of freezing and thawing followed by sonication for 2  $\times$  10 sec with cooling on ice in between. After centrifugation for 5 min, an aliquot of the supernatant was removed and diluted 1:10 with water.  $\beta$ -Galactosidase activity was determined using a chemiluminescent reporter assay (Galacto-Light, Tropix, Inc., Bedford, MA) (65) under conditions in which endogenous enzyme activity is suppressed. Briefly, triplicate 10- $\mu$ l aliquots of the diluted sample were added to luminometer cuvettes followed by 50  $\mu$ l reaction buffer. Tubes were incubated at room temperature for 60 min followed by addition of 100  $\mu$ l accelerator solution. After a 10-sec delay, light production was measured for 10 sec with a luminometer (model 2010, Analytical Bioluminescence Laboratory, San Diego, CA). A standard curve was produced by assaying known amounts of  $\beta$ -galactosidase (Sigma, 300 U/mg) from 1  $\times$  10<sup>-6</sup> U to 5  $\times$  10<sup>-3</sup> U.

### Analysis of Transgene Expression in Developing Mice

Transgenic males were mated to C57BL/6J females. Midday after detection of a vaginal plug was considered embryonic day 0.5 (e 0.5). Whole e 9.5 embryos were fixed in 0.2% glutaraldehyde for 1 h and stained in X-Gal solution (1 mg/ml) overnight. Subsequently, the embryos were oriented in OCT compound, and frozen in hexane cooled in an acetone-dry ice slurry. Twenty-micrometer serial transverse and sagittal sections were cut using a cryostat, mounted onto poly-L-lysine-coated slides, and counterstained with 0.5% neutral red. The processing of e 12.5 embryos was similar except embryos were frozen in OCT compound in hexane before fixation. Sections were postfixated for 5 min in 0.2% glutaraldehyde and

stained in an X-Gal solution (1 mg/ml) overnight at 37 C. Transgenic embryos were identified by PCR amplification of the  $\beta$ -galactosidase reporter gene in genomic DNA prepared from placentas.

### In Situ Hybridization

*In situ* hybridization was performed as described (66, 67) except that fetal tissue sections were rinsed in 2  $\times$  SSC (0.3 M NaCl, 0.03 M sodium citrate, pH 7.3) after fixation and deproteinized in lower levels of proteinase K (0.1  $\mu$ g/ml) (Boehringer Mannheim) for 5 min at 37 C. Adult tissues were deproteinized in 1  $\mu$ g/ml proteinase K for 10 min at 37 C. Antisense and sense riboprobes were generated from a 460-bp Pst1 fragment of the mouse  $\alpha$ -subunit cDNA cloned into the pGEM3Zf+ vector (Promega, Madison, WI) (68). The probes were labeled with [<sup>35</sup>S]uridine triphosphate using T7 or SP6 polymerase. Slides were hybridized overnight in 75% formamide hybridization buffer (66) containing 1.5  $\times$  10<sup>6</sup> cpm of riboprobe at 57 C in a humidified chamber. Posthybridization treatment was as described (66). The final wash was performed in 0.5  $\times$  SSC at 65 C (67). Sections were dehydrated and air dried, dipped in Kodak NTB-2 nuclear emulsion diluted 1:1 with water, exposed for 1 day to 3 weeks, developed, and counterstained with cresyl violet (Sigma).

### Cell Culture, Transient Transfection, and Reporter Gene Assays

Suspension cultures of  $\alpha$ TSH cells were maintained in Dulbecco's Modified Eagle's Medium (DMEM) supplemented with 10% fetal calf serum as previously described (12). Cells were placed in medium containing 10% charcoal-stripped (T<sub>3</sub> depleted) fetal calf serum for 48 h before transfection, which was performed as previously described (69) with minor modifications. Briefly, 100  $\mu$ l cell suspension containing 2  $\times$  10<sup>6</sup> viable cells in DMEM was mixed with 20  $\mu$ g of the test plasmid and 2  $\mu$ g RSV-luciferase as an internal control in a sterile gene-pulse chamber and subjected to a controlled electrical field, then transferred to 60 mm<sup>2</sup> culture plates containing 4 ml DMEM supplemented with 10% charcoal-stripped fetal calf serum and placed in a 5% CO<sub>2</sub> incubator at 37 C. Each construct was transfected in quadruplicate. After incubation for 48 h, cells were harvested and lysed by three cycles of freezing and thawing, and both  $\beta$ -galactosidase and luciferase activity were determined in duplicate 10- $\mu$ l aliquots. For measurement of  $\beta$ -galactosidase activity, a chemiluminescent assay was performed using a commercially available kit (Tropix, Bedford, MA, Galacto-Light). Light emitted was measured after a 2-sec delay and integrated for the next 5 sec using a Monolight 2010 luminometer (Analytical Luminescence Laboratory, San Diego, CA). A standard curve was constructed using known amounts (1  $\times$  10<sup>-6</sup> to 1.5  $\times$  10<sup>-4</sup> U) of  $\beta$ -galactosidase (Boehringer Mannheim). For measurement of luciferase activity, light emitted in the presence of 15 mM ATP, 10 mM MgSO<sub>4</sub>, and 1 mM luciferin was measured and integrated for the initial 10 sec using a Monolight 2010 luminometer. The units of  $\beta$ -galactosidase activity were corrected to the light units of luciferase activity and normalized to CMV promoter activity, which was transfected in parallel. The data are expressed as a percentage of activity for each construct relative to the 5.0  $m\alpha$ - $\beta$ gal construct  $\pm$  SEM ( $n = 4$ ).

### Acknowledgments

We especially thank Paul D. Killen for the kidney histology and Janet Dowding for her excellent assistance with the hormonal regulation studies. We would also like to thank other members of the laboratory for their contributions to this work: T. Saunders, P. Gage, J. Karolyi, and A. Parker. We acknowledge the University of Michigan Reproductive Sciences Center (NIH P30-HD18258) Morphology and Molecular Biology Core facil-

ities, especially K. Brabec, C. Cartwright, and W. Wegenek for helpful assistance, and the University of Colorado Cancer Center (NIH P30-CA46934) Tissue Culture Core facility. We thank B. Carlson, D. Ballou, and M. Uhler for use of their equipment, A. Seasholz, P. Andrews, R. Wood, S. Newman, and K. Mahon for helpful discussions, and M. Meisler for reading the manuscript. We acknowledge the National Hormone and Pituitary Program, the National Institute of Diabetes and Digestive and Kidney Diseases, the National Institute of Child Health and Human Development, and the US Department of Agriculture for providing the PRL, GH, LH $\beta$ , and TSH $\beta$  antibodies.

Received May 23, 1994. Revision received July 1, 1994. Accepted July 6, 1994.

Address requests for reprints to: Sally A. Camper, Department of Human Genetics, University of Michigan Medical School, Medical Science II M4708, Ann Arbor, MI 48109-0618.

This work was supported by American Cancer Society Grant DB-44A (to S.A.C.) and NIH Grants R01HD-30428 (to S.A.C.) PHST32-HD-07274 (to S.K.K.), PHST32-GM-07315 (to S.K.K.), R01DK-47407 (to E.C.R.), and R01DK-02169 (to V.D.S.).

\*Current address: Department of Laboratory Medicine and Pathology, Mayo Clinic, Rochester, Minnesota 55905.

## REFERENCES

- Cordier AC, Deneff J-F, Haumont SM 1976 Ultrastructure of the thyroid in dwarf mice. *Am J Anat* 146:339-358
- Deneff J-F, Cordier AC, Haumont S, Beckers C 1980 The influence of thyrotropin and growth hormone on the thyroid gland in the hereditary dwarf mouse: a morphometric study. *Endocrinology* 107:1249-1257
- Beamer WG, Cresswell LA 1982 Defective thyroid ontogenesis in fetal hypothyroid (*hyt/hyt*) mice. *Anat Rec* 202:387-393
- Stein SA, Oates EL, Hall CR, Grumbles RM, Fernandez LM, Taylor NA, Puett D, Jin S 1994 Identification of a point mutation in the thyrotropin receptor of the *hyt/hyt* hypothyroid mouse. *Mol Endocrinol* 8:129-138
- Ojeda SR, Urbanski HF 1988 Puberty in the rat. In: Knobil E, Neill JD (ed) *The Physiology of Reproduction*. Raven Press, New York, vol 2:1701-1717.
- Foster DL 1980 Comparative development of mammalian females: proposed analogies among patterns of LH secretion in various species. In: La Couza C, Root AW (eds) *Problems in Pediatric Endocrinology*. Academic Press, New York, vol 32:193-210.
- Asa SL, Kovacs K, Laszlo FA, Domokos I, Ezrin C 1986 Human fetal adenohypophysis: histologic and immunocytochemical analysis. *Neuroendocrinology* 43:308-316
- Simmons DM, Voss JW, Ingraham HA, Holloway JM, Broide RS, Rosenfeld MG, Swanson LW 1990 Pituitary cell phenotypes involve cell-specific *Pit-1* mRNA translation and synergistic interactions with other classes of transcription factors. *Genes Dev* 4:695-711
- Swanson LW 1992 Spatiotemporal patterns of transcription factor gene expression accompanying the development and plasticity of cell phenotypes in the neuroendocrine system. *Prog Brain Res* 92:97-113
- Horn F, Windle JJ, Barnhart KM, Mellon PL 1992 Tissue-specific gene expression in the pituitary: the glycoprotein hormone  $\alpha$ -subunit gene is regulated by a gonadotropin-specific protein. *Mol Cell Biol* 12:2143-2153
- Schoderbek WE, Kim KE, Ridgway EC, Mellon PL, Mauer RA 1992 Analysis of DNA sequences required for pituitary-specific expression of the glycoprotein hormone  $\alpha$ -subunit gene. *Mol Endocrinol* 6:893-903
- Sarapura VD, Wood WM, Gordon DF, Ocran KW, Kao MY, Ridgway EC 1990 Thyrotropin expression and thyroid hormone inhibition map to different regions of the mouse glycoprotein hormone  $\alpha$ -subunit gene promoter. *Endocrinology* 127:1352-1361
- Sarapura VD, Wood WM, Gordon DF, Ridgway EC 1992 A cell line that produces the glycoprotein hormone  $\alpha$ -subunit contains specific nuclear factors similar to those present in thyrotropes. *Thyroid* 2:31-38
- Hamernik DL, Keri RA, Clay CM, Clay JN, Sherman GB, Sawyer Jr HR, Nett TM, Nilson JH 1992 Gonadotropin- and thyrotropin-specific expression of the human and bovine glycoprotein hormone  $\alpha$ -subunit gene is regulated by distinct *cis*-acting elements. *Mol Endocrinol* 6:1745-1755
- Kendall SK, Saunders TL, Jin L, Lloyd RV, Glode LM, Nett TM, Keri RA, Nilson JH, Camper SA 1991 Targeted ablation of pituitary gonadotropins in transgenic mice. *Mol Endocrinol* 5:2025-2036
- Windle JJ, Weiner RI, Mellon PL 1990 Cell lines of the pituitary gonadotropin lineage derived by targeted oncogenesis in transgenic mice. *Mol Endocrinol* 4:597-603
- Chin WW 1985 Organization and expression of glycoprotein hormone genes. In: Imura H (ed) *The Pituitary Gland*. Raven Press, New York, pp 103-125
- Fiddes JC, Talmadge K 1984 Structure, expression, and evolution of the genes for the human glycoprotein hormones. *Recent Prog Horm Res* 40:43-78
- Anderson B, Kennedy GC, Nilson JH 1990 The *cis*-acting element located between the cAMP response elements and CCAAT box augments cell-specific expression of the glycoprotein hormone  $\alpha$  subunit gene. *J Biol Chem* 265:21874-21880
- Delegeane AM, Ferland LH, Mellon P 1987 Tissue-specific enhancer of the human glycoprotein hormone  $\alpha$ -subunit gene: dependence on cyclic AMP-inducible elements. *Mol Cell Biol* 7:3994-4002
- Jameson JL, Powers AC, Gallagher GD, Habener JF 1989 Enhancer and promoter element interactions dictate cyclic adenosine monophosphate mediated and cell-specific expression of the glycoprotein hormone  $\alpha$ -gene. *Mol Endocrinol* 3:763-772
- Steger DJ, Altschmied J, Büscher M, Mellon PL 1991 Evolution of placenta-specific gene expression: comparison of the equine and human gonadotropin  $\alpha$ -subunit genes. *Mol Endocrinol* 5:243-255
- Bokar JA, Keri RA, Farmerie TA, Fenstermaker RA, Andersen B, Hamernik DL, Yun J, Wagner T, Nilson JH 1989 Expression of the glycoprotein hormone  $\alpha$ -subunit gene in the placenta requires a functional cyclic AMP responsive element, whereas a different *cis*-acting element mediates pituitary-specific expression. *Mol Cell Biol* 9:5113-5122
- Deleted in proof
- Hammer GD, Fairchild-Huntress V, Low MJ 1990 Pituitary-specific and hormonally regulated gene expression directed by the rat proopiomelanocortin promoter in transgenic mice. *Mol Endocrinol* 4:1689-1697
- Horvath E, Kovacs K 1988 Fine structural cytology of the adenohypophysis in rat and man. *J Electron Microscop Tech* 8:401-432
- Kovacs K, Asa SL (eds) 1991 *Functional Endocrine Pathology*. Blackwell Scientific Publications, Boston, vol 1:272-273
- Osamura RY 1988 Immunoelectron microscopic studies of GH and alpha subunit in GH secreting pituitary adenomas. *Pathol Res Pract* 183:569-571
- Trouillas J, Loras B, Guigard MP, Girod C 1992  $\alpha$ -subunit secretion by normal and tumoral growth hormone cells in humans. *Endocr Pathol* 3[Suppl 1]:S53
- Rossant J, Hopkins N 1992 Of fin and fur: mutational analysis of vertebrate embryonic development. *Genes Dev* 6:1-13
- Rugh R 1990 *The Mouse: Its Reproduction and Development*. Oxford University Press, Oxford, U.K.
- Hammer RE, Krumlauf R, Camper SA, Brinster RL, Tilghman SM 1987 Diversity of alpha-fetoprotein gene expression in mice is generated by a combination of separate enhancer elements. *Science* 235:53-58
- Pinkert CA, Ornitz DM, Brinster RL, Palminter RD 1987 An albumin enhancer located 10 kb upstream functions along with its promoter to direct efficient, liver-specific expression in transgenic mice. *Genes Dev* 1:268-276
- Swift GH, Kruse F, MacDonald RJ, Hammer RE 1989 Differential requirements for cell-specific elastase I en-

- hancer domains in transfected cells and transgenic mice. *Genes Dev* 3:687–696
35. Eissenberg JC, Elgin SCR 1991 Boundary functions in the control of gene expression. *Trends Genet* 7:335–340
  36. Akerblom IE, Ridgway EC, Mellon PL 1990 An  $\alpha$ -subunit-secreting cell line derived from a mouse thyrotrope tumor. *Mol Endocrinol* 4:589–596
  37. Ridgway EC, Kieffer JD, Ross DS, Downing M, Mover H, Chin WW 1983 Mouse pituitary tumor line secreting only the  $\alpha$ -subunit of the glycoprotein hormones: development from a thyrotropic tumor. *Endocrinology* 113:1587–1591
  38. Hu J, Camper SA, Tilghman SM, Miller T, Georgoff I, Serra R, Isom HC 1992 Functional analyses of albumin expression in a series of hepatocyte cell lines and in primary hepatocytes. *Cell Growth Diff* 3:577–588
  39. Lew D, Brady H, Klausung K, Yaginuma K, Theill LE, Stauber C, Karin M, Mellon PL 1993 GHF-1 promoter-targeted immortalization of a somatotropic progenitor cell results in dwarfism in transgenic mice. *Genes Dev* 7:683–693
  40. Liu J-K, DiPersio CM, Zaret KS 1991 Extracellular signals that regulate liver transcription factors during hepatic differentiation *in vitro*. *Mol Cell Biol* 11:773–784
  41. Burnside J, Darling DS, FEC, WWC 1989 Thyroid hormone regulation of the rat glycoprotein hormone  $\alpha$  subunit gene promoter activity. *J Biol Chem* 264:6886–6891
  42. Chatterjee VKK, Lee JK, Rentoumis A, Jameson JL 1989 Negative regulation of the thyroid-stimulating hormone  $\alpha$  gene by thyroid hormone: receptor interaction adjacent to the TATA box. *Proc Natl Acad Sci USA* 86:9114–9118
  43. Kay TWH, Jameson JL 1992 Identification of a gonadotropin-releasing hormone-responsive region in the glycoprotein hormone  $\alpha$ -subunit promoter. *Mol Endocrinol* 6:1767–1773
  44. Pennathur S, Madison LD, Kay TWH, Jameson JL 1993 Localization of promoter sequences required for thyrotropin-releasing hormone and thyroid hormone responsiveness of the glycoprotein hormone  $\alpha$ -gene in primary cultures of rat pituitary cells. *Mol Endocrinol* 7:797–805
  45. Schoderbek WE, Roberson MS, Maurer RA 1993 Two different DNA elements mediate gonadotropin releasing hormone effects on expression of the glycoprotein hormone  $\alpha$ -subunit gene. *J Biol Chem* 268:3903–3910
  46. Shupnik MA, Chin WW, Ross DS, Downing MF, Habener JF, Ridgway EC 1983 Regulation by thyroxine of the mRNA encoding the  $\alpha$ -subunit of mouse thyrotropin. *J Biol Chem* 258:15120–15124
  47. Lin S-C, Li S, Drolet DW, Rosenfeld MG 1994 Pituitary ontogeny of the Snell dwarf mouse reveals Pit-1 independent and Pit-1 dependent origins of the thyrotropes. *Development* 120:515–522
  48. Parsons TF, Bloomfield GA, Pierce JG 1983 Purification of an alternate form of the  $\alpha$ -subunit of the glycoprotein hormones from bovine pituitaries and identification of its O-linked oligosaccharide. *J Biol Chem* 258:240–244
  49. Begeot M, Hemming F, DuBois P, Combarnous Y, DuBois M, Aubert M 1984 Induction of pituitary lactotrope differentiation by luteinizing hormone  $\alpha$  subunit. *Science* 226:566–568
  50. Schwanzel-Fukuda M, Pfaff DW 1989 Origin of luteinizing hormone-releasing hormone neurons. *Nature* 338:161–164
  51. Wray S, Grant P, Gainer H 1989 Evidence that cells expressing luteinizing hormone-releasing hormone mRNA in the mouse are derived from progenitor cells in the olfactory placode. *Proc Natl Acad Sci USA* 86:8132–8136
  52. Wray S, Nieburgs A, Elkabes S 1989 Spatiotemporal cell expression of luteinizing hormone-releasing hormone in the prenatal mouse: evidence for an embryonic origin in the olfactory placode. *Dev Brain Res* 46:309–318
  53. Emanuele N, Connick E, Howell T, Anderson J, Hojvat S, Baker G, Souček J, Kirsteins L, Lawrence AM 1981 Hypothalamic luteinizing hormone (LH): characteristics and response to hypophysectomy. *Biol Reprod* 25:321–326
  54. Hojvat S, Baker G, Kirsteins L, Lawrence AM 1982 TSH in the rat and monkey brain. *Neuroendocrinology* 34:327–332
  55. Hostetter G, Eaton A, Carnes M, Gildner J, Brownfield MS 1987 Immunocytochemical distribution of luteinizing hormone in rat central nervous system. *Neuroendocrinology* 46:185–193
  56. Schorr-Toshav NL, Gurr JA, Catterall JF, Kourides IA 1983 Thyrotropin and  $\alpha$ -subunit in the brain: evidence for biosynthesis within the pituitary. *Endocrinology* 112:1434–1440
  57. Gordon DF, Wood WM, Ridgway EC 1988 Organization and nucleotide sequence of the mouse  $\alpha$ -subunit gene of the pituitary glycoprotein hormones. *DNA* 7:679–90
  58. Ocran KW, Sarapura VD, Wood WM, Gordon DF, Gutierrez-Hartmann A, Ridgway EC 1990 Identification of cis-acting promoter elements important for expression of the mouse glycoprotein hormone  $\alpha$ -subunit gene in thyrotropes. *Mol Endocrinol* 4:766–772
  59. Bonnerot C, Rocancourt D, Briand P, Grimber G, Nicolas J-F 1987 A  $\beta$ -galactosidase hybrid protein targeted to nuclei as a marker for developmental studies. *Proc Natl Acad Sci USA* 84:6795–6799
  60. Miller SA, Dykes DD, Polesky HF 1988 A simple salting out procedure for extracting DNA from human nucleated cells. *Nucleic Acids Res* 16:1215
  61. Kalnins A, Otto K, Rütter U, Müller-Hill B 1983 Sequence of the *lac Z* gene of *Escherichia coli*. *EMBO J* 2:593–597
  62. Saiki RK, Gelfand DH, Stoffel S, Scharf SJ, Higuchi R, Horn GT, Mullis KB, Erlich HA 1988 Primer-directed enzymatic amplification of DNA with a thermostable DNA polymerase. *Science* 239:487–491
  63. Bradford MM 1976 A rapid and sensitive method for the quantitation of microgram quantities of protein utilizing the principle of protein-dye binding. *Anal Biochem* 72:248–254
  64. Gautvik KM, Tashnian AH, Kourides IA, Weintraub BD, Graeber CT, Maloof F, Suzuki K, Zuckerman JE 1974 Thyrotropin-releasing hormone is not the sole physiologic mediator of prolactin release during sucking. *N Engl J Med* 290:1162–1165
  65. Jain V, Magrath I 1991 A chemiluminescent assay for quantitation of  $\beta$ -galactosidase in the femtogram range: Application to quantitation of  $\beta$ -galactosidase in *lacZ*-transfected cells. *Anal Biochem* 199:119–124
  66. Herman JP, Weigand SJ, Watson SJ 1990 Regulation of basal corticotropin-releasing hormone and arginine vasopressin messenger ribonucleic acid expression in the paraventricular nucleus: effects of selective hypothalamic deafferentations. *Endocrinology* 127:2408–2417
  67. Seasholtz A, Bourbonais F, Harnden C, Camper S 1991 Nucleotide sequence and expression of the mouse corticotropin-releasing hormone gene. *Mol Cell Neurosci* 2:266–273
  68. Chin WW, Kronenberg HM, Dee PC, Maloof F, Habener JF 1981 Nucleotide sequence of the mRNA encoding the pre- $\alpha$ -subunit of mouse thyrotropin. *Proc Natl Acad Sci USA* 78:5329–5333
  69. Wood WM, Kao MY, Gordon DF, Ridgway EC 1989 Thyroid hormone regulates the mouse thyrotropin  $\beta$ -subunit gene promoter in transfected primary thyrotropes. *J Biol Chem* 264:14840–14847
